1 **The Role of Community Beliefs and Practices on the Spread of Ebola in Uganda, September**  
2 **2022**

3 Helen Nelly Naiga<sup>1\*</sup>, Jane Frances Zalwango<sup>1</sup>, Saudah N. Kizito<sup>1</sup>, Brian Agaba<sup>1</sup>, Brenda N.  
4 Simbwa<sup>1</sup>, Maria Goretti Zalwango<sup>1</sup>, Rebecca Akunzirwe<sup>1</sup>, Zainah Kabami<sup>1</sup>, Peter Chris  
5 Kawugenzi<sup>1</sup>, Robert Zavuga<sup>1</sup>, Mackline Ninsiima<sup>1</sup>, Patrick King<sup>1</sup>, Mercy Wendy Wanyana<sup>1</sup>,  
6 Thomas Kiggundu<sup>1</sup>, Richard Migisha<sup>1</sup>, Doreen Gonahasa<sup>1</sup>, Irene Kyamwine<sup>1</sup>, Benon Kwesiga<sup>1</sup>,  
7 Daniel Kadobera<sup>1</sup>, Lilian Bulage<sup>1</sup>, Alex Ario Riolexus<sup>1</sup>, Sarah B. Paige<sup>3</sup>, and Julie R. Harris<sup>1, 2</sup>

8  
9 <sup>1</sup>Uganda Public Health Fellowship Program, Kampala, Uganda  
10 <sup>2</sup>Division of Global Health Protection, US Centers for Disease Control and Prevention, Kampala,  
11 Uganda  
12 <sup>3</sup>Office of Health and HIV, USAID/Uganda

13  
14 **Correspondence:** [hnelly@musph.ac.ug](mailto:hnelly@musph.ac.ug), [naigahelen@uniph.go.ug](mailto:naigahelen@uniph.go.ug)

15 **Target Journal: PLoS One**

16  
17 **Abstract word count:307**

18 **Abstract word limit: 350**

19 **Body word count:3696**

20 **Body word limit: No word limit**

21 **Tables & figures count: No Tables**

22 **Tables & figures limit: No tables**

23

24

25 **Abstract**

26 **Background:** Traditional community beliefs and cultural practices can facilitate the spread of  
27 ebolaviruses during outbreaks. On September 20, 2022, Uganda declared a Sudan Virus Disease  
28 (SVD) outbreak after a case was confirmed in Mubende District. During September–November  
29 2022, the outbreak spread to eight additional districts. We investigated the role of community  
30 beliefs and practices in the spread of SUDV in Uganda in 2022.

31 **Methods:** A qualitative study was conducted in Mubende, Kassanda, and Kyegegwa districts in  
32 February 2023. We conducted nine focus group discussions (FGDs) and six key informant  
33 interviews (KIIs). FGDs included SVD survivors, household members of SVD patients, traditional  
34 healers, religious leaders, and community leaders. Key informants included community,  
35 political, and religious leaders, traditional healers, and health workers. We asked about  
36 community beliefs and practices to understand if and how they contributed to the spread of  
37 SUDV. Interviews were recorded, translated, transcribed, and analyzed thematically.

38 **Results:** Frequently-reported themes included beliefs that the community deaths, later found  
39 to be due to SVD, were the result of witchcraft or poisoning. Key informants reported that SVD  
40 patients frequently consulted traditional healers or spiritual leaders before seeking formal  
41 healthcare or visited them after formal healthcare failed to improve their health conditions.  
42 They also noted that traditional healers treated patients with signs and symptoms of SVD  
43 without protective measures. Additional themes included religious leaders conducting laying-  
44 on-of-hands prayers for SVD patients and symptomatic contacts, SVD patients and their  
45 symptomatic contacts hiding in friends' homes, and exhumation of SVD patients originally  
46 buried in safe and dignified burials, to enable traditional burials.

47 **Conclusion:** Varied community beliefs and cultural practices likely promoted SVD outbreak  
48 spread during the 2022 outbreak in Uganda. Controlling ebolavirus outbreaks in Uganda could  
49 be aided by the involvement of formal public health systems, traditional healers, and religious  
50 leaders. Community engagement during inter-epidemic periods could aid in the effective  
51 management of future outbreaks in Uganda by identifying socially acceptable and scientifically  
52 supported alternatives for infection control.

53 **Keywords:** Ebola, Sudan virus, outbreak, beliefs, practices, traditional healers, Uganda

54

55

## 56 Introduction

57 Ebola disease (EBOD) is a viral hemorrhagic fever suspected to be transmitted from infected  
58 primates, bats, or other wildlife to humans, generally through human contact with blood or  
59 body fluids [1, 2]. Infection in humans usually causes acute fever and, in many people, a  
60 hemorrhagic syndrome later in the course of disease that is fatal in 50-90% of cases, even with  
61 treatment [3, 4]. Contact with the body fluids of infected patients can lead to infections in their  
62 household members, close contacts, and facility-based caregivers [5-8]. Even after the death of  
63 a patient, the body remains highly infectious, and contact with the bodies of persons who have  
64 died of Ebola without appropriate personal protective equipment is considered extremely high-  
65 risk [9].

66 In African settings, community members often seek advice from traditional healers or religious  
67 leaders before, or in place of, accessing formal medical care [10]. Practices among these  
68 persons can involve very close contact without appropriate protective equipment. An example  
69 is the treatment of “false teeth” (locally called *ebinyo*), which involves the gouging-out of  
70 unerupted teeth, believed by many communities to be a source of illness in children [10, 11].  
71 Other practices include crude tonsillectomies to treat *gapfura*, a childhood illness usually  
72 characterized by respiratory disease, in which a child’s tonsils and throat are manually scraped  
73 by a traditional healer until blood and pus drain from the mouth [12]. Beyond traditional  
74 treatments, some cultural practices, such as washing and touching of the body of dead persons  
75 by mourners at a funeral, can also spread infection [13].

76 On September 20, 2022, for the first time in over a decade, Uganda declared an outbreak of  
77 Sudan Virus Disease (SVD) caused by the Sudan virus (formerly called *Sudan ebolavirus*). By the  
78 end of the outbreak, there were 142 confirmed cases and 22 probable cases from nine districts  
79 [14, 15]. Anecdotal reports from the epidemiologic investigations revealed that many patients  
80 had undergone treatment by traditional healers or religious leaders for their illnesses before  
81 they were diagnosed with SVD.

82 To effectively provide interventions to stop an outbreak, it is necessary to understand specific  
83 cultural practices and beliefs that may facilitate disease spread, and to work with the  
84 community to design interventions that can maintain safety while respecting important cultural  
85 aspects [1, 16]. However, the role of such beliefs and practices and how they may have  
86 contributed to the outbreak were poorly understood. We evaluated how community beliefs  
87 and cultural practices may have contributed to the spread of Ebola across Uganda, in 2022.

88

89

90

## 91 **Methods**

### 92 **Study design and site**

93 We conducted a qualitative study in Mubende, Kassanda, and Kyegegwa Districts. We  
94 conducted key informant interviews (KII) and focus group discussions (FGDs) with healthcare  
95 workers (HCW), village health team members (community health workers, also called VHTs),  
96 traditional healers, religious leaders, and district surveillance staff who participated in the  
97 response of the outbreak.

98 We also reviewed the case investigation reports collected by the field teams during the  
99 outbreak to summarize self-reported visits to traditional healers and religious leaders occurring  
100 after the onset of illness for patients.

#### 101 Data collection

102 The study participants were identified, consented, recruited, and organized with the assistance  
103 of VHTs in their communities. All interviews were conducted in the local language (Luganda)  
104 and used interview guides.

105

106 We conducted nine FGDs, each with a maximum of 10 participants. Four FGDs in Mubende  
107 District, four FGDs in Kassanda District, and one FGD in Kyegegwa District. Only one FGD was  
108 conducted in Kyegegwa because, even though Kyegegwa borders Mubende and Kassanda,  
109 there were very few cases compared to Mubende and Kassanda districts. In the FGDs, we asked  
110 about the different community practices and beliefs that could have contributed to the spread  
111 of SVD in these districts. Each FGD included five males and five females. The participants were  
112 selected by convenience sampling by the village health team leaders (VHTs) from the affected  
113 villages.

114 Six KIIs were conducted. These included two health workers from the clinics where most early  
115 cases were treated, two traditional healers, and two religious leaders. Three KIIs were  
116 conducted in Mubende District and three KIIs in Kassanda District. We purposively selected the  
117 key informant participants from the most affected subcounties in the two districts.

#### 118 **Data analysis**

119 FGDs and KIIs were audio recorded, translated into English, and transcribed verbatim for  
120 analysis at the end of each data collection day. Data were stored by the principal investigator  
121 on a password-protected computer. Participants were identified based on the type of interview  
122 and district of residence (e.g., FGDM1 represents FGD Mubende 1; FGDK1 represents FGD  
123 Kassanda 1). This code was applied to transcripts. Transcripts were reviewed by the study

124 investigators, coded, and analyzed thematically using the CDC Excel thematic analysis tool, ver.  
125 10.18.22 [1]

## 126 **Ethics approval and consent to participate**

127 The Ministry of Health of Uganda gave the directive and approval to carry out this investigation.  
128 Further approval to conduct this study was obtained from Mubende and Kassanda District  
129 offices, Mubende Regional Referral Hospital case management team, the National Institute of  
130 Public Health and Uganda Ministry of Health. This activity was reviewed by CDC and was  
131 conducted consistent with applicable federal law and CDC policy. §See e.g., 45 C.F.R. part 46, 21  
132 C.F.R. part 56; 42 U.S.C. §241(d); 5 U.S.C. §552a; 44 U.S.C. §3501 et seq. Participants provided  
133 informed written consent before participating in the study.

## 134 **Results**

135 Five major themes emerged potentially contributing to the spread of SVD among the different  
136 districts: 1) engaging traditional healers; (2) communalism; 3), touching ill persons during  
137 prayers; (4) attribution of illness to supernatural forces, and 5) cultural practices around burials.  
138 Reviews of case investigation reports identified at least 11 patients who went to one or more  
139 traditional healers during their illnesses and received unspecified treatment, and four who  
140 went to a traditional healer and had *ebinyo*, *gapfura*, or removal of the epiglottis performed. At  
141 least seven patients underwent traditional prayers for healing during which religious leaders  
142 laid hands on them to heal them. Two SVD patients were traditional healers and two were  
143 religious leaders.

144

### 145 **1. Engaging traditional healers**

146 FGD and KII participants reported that when someone falls sick suddenly, it is usually assumed  
147 to be due to witchcraft. At the beginning of the outbreak, many FGD participants in Mubende  
148 District felt that Ebola was a curse upon their community and that traditional medicine was a  
149 necessary intervention to counteract the curse. They believed that traditional medicine would  
150 reverse the witchcraft and thus reduce the community deaths. However, participants reported  
151 that “the traditional practices only spread Ebola to other areas”.

152 *“...When the child started passing out blood from the mouth suddenly, we thought we needed*  
153 *to consult with the traditional healers because we all thought it was a traditional illness. We*  
154 *needed to consult our ancestors because her illness was strange. She was vomiting blood so we*

155 *needed to know where the blood was coming from. We took her back to our home district. The*  
156 *traditional healer, her grandmother, and others got infected with Ebola.”*

157 *-FGD participant, female, Mubende*

158 *“...In the beginning, many community members died, but we thought it was witchcraft and*  
159 *because many were passing out blood, rumors had it that it was poisoning. So the community*  
160 *members went to traditional healers to help them suck that poison out of their bodies using*  
161 *traditional herbs instead of seeking care in the health facilities. This contributed to the spread of*  
162 *Ebola in our community and the neighboring districts.”*

163 *-KII participant, female, Mubende*

164 *“...when our brother fell sick, we thought our enemies had cast a spell on him, so we took him to*  
165 *a traditional healer in Luweero and another one in Kampala. After his death, we lost six other*  
166 *family members to Ebola and two survivors.”*

167 *-FGD participant, male, Mubende*

168 *“... when my brother started coughing and vomiting blood, my mother suggested that we take*  
169 *him to Kampala to a renowned traditional healer. Taking my brother to (a traditional healer in)*  
170 *Kampala led to the first cluster of Ebola cases in Kampala.”*

171 *-FGD participant, male, Kassanda*

172 Participants reported that some traditional healers ended up contracting the disease  
173 themselves and passing it to their other patients or family members.

174 *“... My mother was a traditional healer, (and) she treated a young girl who was vomiting and*  
175 *coughing blood from Mubende District. The girl’s mother thought she had false teeth but my*  
176 *mother had to check if her tonsils had burst. So, mother used her bare hands to check where the*  
177 *blood from this girl’s mouth was coming from. Days after she treated this girl, Mother fell sick.*  
178 *She was infected with Ebola and died a week after she was taken to the Ebola treatment unit in*  
179 *Mubende. My young brother and father also got Ebola but survived.”*

180 *FGD participant, female, Kyegegwa*

181 *“...My wife treated one of the first patients in Kassanda with different herbs as the entire*  
182 *community initially thought he was passing out blood because of witchcraft. This young man*  
183 *was a thief of goats...so the community members thought he had been bewitched this time. My*  
184 *wife got infected with Ebola and died. My maid (who took care of my wife while she was sick)*  
185 *and I also got infected with Ebola but luckily survived.”*

186 *FGD participant, male, Kassanda*

187 **2. Communalism**

188 The FGD participants reported that if a community member is sick or has a patient, the entire  
189 community is obliged to support that member. The participants noted that the practice of  
190 shared responsibility also contributed to the spread of Ebola in this community and other areas.

191 *"...In this community, people are always willing to help. I invited my neighbors to help me carry  
192 the child when she was vomiting blood. I didn't know this was Ebola. This is how my neighbors  
193 got infected with Ebola".*

194 *FGD participant, female, Mubende*

195 *"... one of the first Ebola cases in Kassanda was a young man who had a butchery and roasted  
196 goat's meat in the evenings. When he fell sick...his many friends came to visit him in the clinic.  
197 At the time of his evacuation, he was vomiting blood but many of his friends were there to  
198 support him. This communalism led to so many other Ebola cases and deaths in our  
199 community".*

200 *FGD participant, male, Kassanda*

201 *"...when our elder sister fell sick, we all participated in taking care of her until she passed on.  
202 After her death, we lost four other members of our family to Ebola and two Ebola survivors".*

203 *FGD participant, female, Mubende*

204 *"...[when] my brother started vomiting blood, we moved to Kampala, to live with my mother's  
205 sister for better management. This led to all these family members, the neighbors and I catching  
206 Ebola in Kampala. We lost so many people to Ebola".*

207 *FGD participant, male, Kassanda*

208 *"...In our culture, it is an abomination for someone to fall sick, and fail or refuse to visit them  
209 while in the health facility. Many of these young men got infected during those moments  
210 because (an Ebola case) was heavily bleeding. Many took it upon themselves to participate in  
211 bathing and washing clothes for the patient. This exposed many of them to Ebola. It is very  
212 unfortunate that we lost most of these youth who would make our community a better place in  
213 the future".*

214 *KII participant, female, Kassanda*

215 **3. Touching ill persons during prayers**

216 FGD participants reported that religious healers who prayed for Ebola victims by laying hands  
217 on the sick not only ended up contracting the disease themselves but passing the disease to

218 other people. It was reported that different church members contracted Ebola virus after they  
219 participated in a healing prayer session in which they laid hands on the body of a sick person.

220 *"...As a pastor, when praying for someone seeking spiritual healing, you can't avoid getting in*  
221 *contact with them. We lay hands on them for a special healing and anointing. This exposed us*  
222 *as spiritual healers to Ebola but also our family and church members. We lost some church*  
223 *elders in the church (prayer warriors and intercessors) to Ebola. My family and I are also*  
224 *survivors of Ebola."*

225 *FGD participant, male, Mubende*

226 *"...during that period, many people were seeking for spiritual healing as (they) believed their*  
227 *community had been put under a spell. So my son, being a pastor in this community, prayed*  
228 *for so many sick people. This exposed him, his wife, and son to Ebola. My grandson died but his*  
229 *parents are Ebola survivors."*

230 *FGD participant, female, Mubende*

231 *"...Many sought spiritual healing in our church. My wife and I prayed for some neighbors who*  
232 *had malaria-like symptoms but later started having bleeding symptoms. My wife shortly fell ill,*  
233 *she was six months pregnant when she was taken at the Ebola treatment unit. I am glad she*  
234 *survived Ebola but sadly a few days after her discharge, we lost our baby."*

235 *FGD participant, male, Mubende*

#### 236 4. Attribution of illness to supernatural forces

237 FGD and KII participants reported that there was general lack of understanding of the Ebola  
238 disease, and this had a negative influence on adherence to preventive measures. Many  
239 community members initially believed that the illnesses were caused by witchcraft or were  
240 punishment from God.

241 *"...We didn't know what this disease was and how it came in our community. I thought it was a*  
242 *disease found on the borders of Congo. I had heard of that disease but in DRC and at its borders.*  
243 *That is why many people fell sick and others died when Ebola was in our district. Many of us*  
244 *thought this was witchcraft or a punishment from God."*

245 *FGD participant, male, Kassanda.*

246 *"... During the Ebola lockdown in our district, we didn't practice the control measures because*  
247 *most of us as young men, we thought it was witchcraft (and) not Ebola. When our friends fell*  
248 *sick, we would visit them. This led to more Ebola cases in (the village). We only believed when*  
249 *our friends started dying. This scared us and we eventually started practicing the preventive*  
250 *measures."*



251 *FGD participant, male, Kassanda.*

252 *"...The community didn't believe the cause of death among the many community deaths in*  
253 *early August was a medical disease. They believed it was a traditional spell, so many more*  
254 *people died as all the burials were never supervised".*

255 *KI, male, Mubende*

256 *"...Our communities also believed that the community members who died in the earlier*  
257 *days...were poisoned by some new community members to steal their land as rumor had it that*  
258 *our land had gold."*

259 *FGD participant, male, Mubende*

260 *"...A very old man (over 100 years) died, and his people started dying, the family lost six people*  
261 *in a duration of one month. The rumors had it that the old man wouldn't die alone, he had to*  
262 *take some relatives with him as it was believed that he was a witch doctor."*

263 *FGD participant, male, Mubende*

## 264 **5. Religious and cultural practices around burials**

265 In Uganda, funeral and burial practices hold extreme significance, as they are perceived as  
266 crucial steps in transitioning from the world of the living to the spiritual world. Common funeral  
267 rituals include washing and cleaning of the deceased person's body before burial. If a person  
268 being buried fails to obtain the appropriate ancestral spiritual rituals - which should be given by  
269 the surviving close relatives – it is believed that the deceased's spirit may return and punish the  
270 living relatives. As a result, some community members exhumed bodies of persons who had  
271 been buried in safe and dignified burials to achieve the appropriate rituals before re-burial.

272 *"...one of the Ebola cases in Kassanda was from a very strong Moslem background. When he*  
273 *passed on, the health burial team buried him at night. However, his relatives decided to exhume*  
274 *his body to bury him in the right Islam (way) (wash his body), perform all the Islam funeral*  
275 *practices and confirm that all his body parts were intact".*

276 *KI, male, Kassanda*

277 *"...the two men who exhumed [an Ebola patient]'s body, bathed and wrapped this body, all got*  
278 *infected with Ebola and died. These two men were known for exhuming bodies and transferring*  
279 *the graves in case someone has sold their burial grounds. These two men were in their late 50s*  
280 *so they were not friends with [the patient]".*

281 *FGD participant, female, Mubende*

282 *"...In our culture, when someone dies, we have so many rituals that we practice. Some of which*  
283 *include bathing, shaving and rolling the dead body in different clothes. In the earlier days of*  
284 *August, as a community, we didn't know that this disease was so contagious. That is how Ebola*  
285 *spread to other areas and killed many of our people".*

286 *FGD participant, male, Mubende*

287 *"...During burials of some community members who had been bleeding in their late stages of*  
288 *their illnesses, some people would come from other districts like Kampala. These people would*  
289 *be close relatives of the deceased. They actively participated in the burial rituals, this led to*  
290 *some Ebola cases in Kampala".*

291 *KI, male, Mubende*

## 292 **Discussion**

293 We identified multiple beliefs and practices that contributed to the spread of Sudan virus in  
294 Uganda during 2022. These included engaging traditional healers for treatment,  
295 communalism, touching ill persons during prayers, attribution of illness to supernatural  
296 forces, and conduct during traditional burials. Such practices should be recognized for their  
297 potential contribution to spread of infection during ebolavirus outbreaks in Uganda and  
298 similar settings. A follow up study to identify the acceptable alternatives to these  
299 approaches together with the community could help reduce spread of infection in future  
300 outbreaks.

301 Traditional healers are regarded as custodians of daily traditional and cultural values in many  
302 communities in Africa, and using them as the first line of care during an illness is common [18,  
303 19]. Media reports from 2021 suggested that traditional healers outnumbered medical doctors  
304 by a ratio of 35:1 in Uganda [20]. Traditional healers are often more highly regarded than  
305 persons who promote conventional medicine or other forms of health care [18]. Many practices  
306 of traditional healers in Uganda put them – and subsequently their future patients – potentially  
307 at risk of ebolavirus infections during an outbreak. A 2003 study from Northern Uganda  
308 reported traditional healers making incisions into people's bodies and rubbing in herbal  
309 medicine, which led to the spread of ebolavirus [21]. Reports for at least 15 patients in our  
310 study documented their visits to traditional healers while they were ill; participants in our  
311 qualitative study suggested that such visits led to at least some subsequent SUDV infections.  
312 Indeed, at least two patients in the outbreak were themselves traditional healers. Because of  
313 the preference in some communities for traditional healers as the first line of treatment, some  
314 have advocated for the engagement of traditional healers in controlling the spread of  
315 ebolaviruses [4, 16, 18]. In a study in West Africa, traditional healers were trained about  
316 ebolaviruses, how to recognize symptoms early, where suspected patients should be referred,  
317 and how to protect themselves; they were subsequently involved in risk communication for

318 their communities. The communities trusted their communication, ultimately supporting  
319 disease control in the outbreak [18]. Another study in northwestern Uganda that described the  
320 training of traditional healers to identify plague symptoms and refer patients noted the  
321 importance of not stigmatizing or treating traditional healers as ‘less than’ conventional health  
322 providers. The study emphasized the importance of respecting differences in belief and practice  
323 to facilitate collaborative relationships for epidemic control [2].

324 Some people believed that the illness caused by SDV infection was caused by supernatural  
325 beings, witchcraft from neighbors or vengeance from an offended god as a result of  
326 transgressions committed in the past by an individual or parents. This is commonly observed  
327 during ebolavirus outbreaks, which frequently occur in communities with a strong belief in  
328 witchcraft as a cause of illness [1, 2,9]. A study in Nigeria also found that community members,  
329 especially those living in rural areas, believed that most health problems were spiritually  
330 related and could be resolved without allopathic medicine, resulting in their seeking treatment  
331 from a traditional healer to remove the witchcraft rather than a hospital [22]. In Sierra Leone,  
332 both traditional healers and community members initially attributed outbreak-related deaths to  
333 witchcraft or poisoning [23].

334  
335 Religious and spiritual healing practices (touching ill persons during prayers) may also have  
336 contributed to the spread of the 2022 SDV outbreak in Uganda. Multiple patients had  
337 documented experiences during their illness of visiting religious leaders and those healers  
338 themselves also represented some of the outbreak patients. Community members reported  
339 that they sought spiritual healing to dispel the ‘witchcraft’. Similar findings were reported in a  
340 study in West Africa, in which religious leaders both contracted the illness from sick persons  
341 and passed it to others in prayer sessions [18, 24]. A subsequent intervention engaging religious  
342 leaders enabled them to educate their institutional members about the importance of seeking  
343 healthcare first in health facilities, isolating if ill, and using protective equipment in case of  
344 unexplained bleeding [25].

345 The normal cultural practices around funerals in many African settings, which involve washing  
346 and touching the body by family and mourners, can contribute to Ebola viruse(or SDV) spread  
347 during an outbreak [26]. Such practices, according to community members, are highly valued  
348 because they are regarded as critical steps in the transition from the world of the living to the  
349 spiritual world, which must be facilitated by surviving relatives through specific rituals [2, 4, 13,  
350 18]. Similar to other studies, we heard from participants that funeral practices contributed to  
351 the spread of SUDV in Uganda [14, 21, 27]. Other practices reported by study participants, such  
352 as exhumation, are related to the lack of acceptance of safe and dignified burials, and  
353 contributed to the spread of SUDV. The rapid burial of the deceased without allowing relatives  
354 to view the dead bodies gave rise to the suspicion that medical professionals were keeping the  
355 corpses in order to sell their relatives' body parts [14]. During a SUDV outbreak in Northern

356 Uganda in 2003, such mistrust was exacerbated by rumors that some Westerners were  
357 purchasing human body parts [8, 28]. Without mutual trust between community members and  
358 health workers, adherence to preventive measures during an Ebola outbreak is likely to be  
359 compromised. In some communities, health officials attempting to conduct safe and dignified  
360 burials were attacked and prevented from executing their duties [28]. Initiating community  
361 engagement studies to identify appropriate and acceptable ways to allow them to participate in  
362 safe and dignified burials could reduce illness spread in a future SVD outbreak.

### 363 **Conclusion**

364 The recent Sudan virus outbreak response in Uganda has demonstrated the importance of  
365 involving community, traditional, and religious leaders to facilitate disease control during  
366 outbreaks. Collaboration between health workers and these leaders at all stages of outbreak  
367 response campaigns, especially when the interventions include activities incompatible with  
368 affected communities' cultural and religious practices or beliefs, may help effectively contain  
369 disease spread.

### 370 **Recommendations**

371 Engagement of formal public health systems with traditional healers and religious leaders in  
372 Uganda may help facilitate ebolavirus outbreak control. Community engagement activities  
373 during inter-epidemic periods – before an outbreak happens - to identify alternative acceptable  
374 and scientifically-backed actions to control infection is likely to support disease control in future  
375 outbreaks. For example, holding community educational sessions on ebolavirus-related risks to  
376 traditional healers and the community and dialogues on acceptable practices around safe and  
377 dignified burials during a non-outbreak period may help communities feel that they are  
378 stakeholders in the response and contribute to buy-in when an outbreak does occur. It may also  
379 be useful to engage formal healthcare professionals with traditional and religious leaders'  
380 regional and national associations to discuss these approaches and how to implement them in  
381 the event of an outbreak. Such approaches could also help bring these leaders on board when  
382 an outbreak of any kind occurs.

384 **List of abbreviations**

385 EBOD: Ebola disease

386 FGD: Focus group discussion

387 KII: Key informant interview

388 TH: Traditional Healer

389 DSFP: District Surveillance focal person

390 SUVD: Sudan Virus

391 SVD: Sudan Virus Disease

392 EBOV is Ebola Zaire Virus

393 **Declarations**

394 **Ethics approval and consent to participate**

395 The Ministry of Health of Uganda gave the directive and approval to carry out this investigation.  
396 Further approval to conduct this study was obtained from Mubende and Kassanda District  
397 offices, Mubende Regional Referral Hospital case management team, the National Institute of  
398 Public Health and Uganda Ministry of Health.

399 This activity was reviewed by CDC and was conducted consistent with applicable federal law  
400 and CDC policy.§

401 §See e.g., 45 C.F.R. part 46, 21 C.F.R. part 56; 42 U.S.C. §241(d); 5 U.S.C. §552a; 44 U.S.C. §3501  
402 et seq.

403 *"Sarah Paige was employed by USAID when the research for the current paper was conducted.*

404 *The views and opinions expressed in this paper are those of the authors and not necessarily the views*  
405 *and opinions of the United States Agency for International Development."*

406 **Consent for publication**

407 Not applicable.

408 **Availability of data and materials**

409 The datasets upon which our findings are based belong to the Uganda Public Health Fellowship  
410 Program. For confidentiality reasons, the datasets are not publicly available. However, the  
411 datasets can be made available upon reasonable request from the corresponding author and  
412 with permission from the Uganda Public Health Fellowship Program.

413 **Conflict of interest**

414 The authors declare that they have no conflict of interest.

415 **Acknowledgments**

416 The authors thank the staff of the Public Health Fellowship Program for the technical support  
417 and guidance offered during this study. The authors also extend their appreciation to Mubende

418 and Kassanda district local council and health authorities for the support offered during the  
419 investigation.

#### 420 **Copyright and licensing**

421 All materials in the Uganda National Institute of Public Health Quarterly Epidemiological  
422 Bulletin is in the public domain and may be used and reprinted without permission; citation as  
423 to source; however, is appreciated. Any article can be re-printed or published. It should be  
424 referenced in the original form if cited as a reprint.

#### 425 **Funding source and disclaimer**

426 This outbreak investigation was supported by the President’s Emergency Plan for AIDS Relief  
427 (PEPFAR) through US Centers for Disease Control and Prevention Cooperative Agreement  
428 number GH001353–01 through Makerere University School of Public Health to the Uganda  
429 Public Health Fellowship Program, Ministry of Health. The contents of this article are exclusively  
430 the responsibility of the authors and do not essentially represent the official views of the US  
431 Centers for Disease Control and Prevention, the United States Agency for International  
432 Development, Makerere University School of Public Health, or the Ministry of Health, Uganda.

#### 433 **Authors’ contributions**

434 HNN took the lead in conceptualizing the study idea, data collection, data analysis, writing, and  
435 editing of the manuscript. JFZ, SNK, BA, GMZ, BNS, RA, ZK, PCK, RZ, MN, PK, MWW, and KT were  
436 involved in data collection, data analysis, and writing of the manuscript. RM, DG, IK, BK DK, LB,  
437 ARA, SP, and JH were involved in conceptualizing the study idea and writing, editing, and  
438 reviewing the manuscript. All authors read and approved the final manuscript.

439

440

441 **References**

442

- 443 1. Coltart, C.E., et al., *The Ebola outbreak, 2013–2016: old lessons for new epidemics*. Philosophical  
444 Transactions of the Royal Society B: Biological Sciences, 2017. **372**(1721): p. 20160297.
- 445 2. Gray, N., et al., 'When Ebola enters a home, a family, a community': A qualitative study of  
446 population perspectives on Ebola control measures in rural and urban areas of Sierra Leone. PLoS  
447 neglected tropical diseases, 2018. **12**(6): p. e0006461.
- 448 3. Dallatomasina, S., et al., *Ebola outbreak in rural West Africa: epidemiology, clinical features and*  
449 *outcomes*. Tropical Medicine & International Health, 2015. **20**(4): p. 448-454.
- 450 4. Kasereka, M.C. and M.T. Hawkes, 'The cat that kills people': community beliefs about Ebola  
451 origins and implications for disease control in Eastern Democratic Republic of the Congo. Pathogens and  
452 global health, 2019. **113**(4): p. 149-157.
- 453 5. Marshall, K., *Roles of religious actors in the West African Ebola response*. Development in  
454 Practice, 2017. **27**(5): p. 622-633.
- 455 6. Martineau, F., A. Wilkinson, and M. Parker, *Epistemologies of Ebola: reflections on the*  
456 *experience of the Ebola Response Anthropology Platform*. Anthropological Quarterly, 2017: p. 475-494.
- 457 7. Muzembo, B.A., et al., *Local perspectives on Ebola during its tenth outbreak in DR Congo: A*  
458 *nationwide qualitative study*. PLoS One, 2020. **15**(10): p. e0241120.
- 459 8. Okware, S., et al., *An outbreak of Ebola in Uganda*. Tropical Medicine & International Health,  
460 2002. **7**(12): p. 1068-1075.
- 461 9. Shears, P. and T. O'Dempsey, *Ebola virus disease in Africa: epidemiology and nosocomial*  
462 *transmission*. Journal of Hospital Infection, 2015. **90**(1): p. 1-9.
- 463 10. Nuwaha, F., et al., *False teeth" Ebiino" and Millet disease" Oburo" in Bushenyi district of Uganda*.  
464 African health sciences, 2007. **7**(1).
- 465 11. Wandera, M.N. and B. Kasumba, "Ebinyo"—the practice of infant oral mutilation in Uganda.  
466 Frontiers in Public Health, 2017. **5**: p. 167.
- 467 12. Yao-Cohen, M.L., et al., *Crude tonsillectomy and local concepts of illness in Kisoro, Uganda:*  
468 *community perception of gapfura and its treatment*. Global Public Health, 2013. **8**(3): p. 298-311.
- 469 13. Lee-Kwan, S.H., et al., *Facilitators and barriers to community acceptance of safe, dignified*  
470 *medical burials in the context of an Ebola epidemic, Sierra Leone, 2014*. Journal of health  
471 communication, 2017. **22**(sup1): p. 24-30.
- 472 14. Rai, A., et al., *Ebola Virus Disease in Uganda: A global emergency call*. Annals of Medicine and  
473 Surgery, 2022. **84**: p. 104825.
- 474 15. Kiggundu, T., *Notes from the Field: Outbreak of Ebola Virus Disease Caused by Sudan*  
475 *ebolavirus—Uganda, August–October 2022*. MMWR. Morbidity and Mortality Weekly Report, 2022. **71**.
- 476 16. Thiam, S., et al., *Challenges in controlling the Ebola outbreak in two prefectures in Guinea: why*  
477 *did communities continue to resist?* The Pan African Medical Journal, 2015. **22**(Suppl 1).
- 478 17. Wolff, B., et al., *Collecting and analyzing qualitative data*. The CDC Field Epidemiology Manual;  
479 Oxford University Press: Oxford, UK; New York, NY, USA, 2019: p. 213-228.
- 480 18. Manguvo, A. and B. Mafuvadze, *The impact of traditional and religious practices on the spread*  
481 *of Ebola in West Africa: time for a strategic shift*. The Pan African Medical Journal, 2015. **22**(Suppl 1).
- 482 19. Buseh, A.G., et al., *The Ebola epidemic in West Africa: Challenges, opportunities, and policy*  
483 *priority areas*. Nursing Outlook, 2015. **63**(1): p. 30-40.
- 484 20. Independent, T., *Traditional healers outnumber medical doctors by 35:1 in Uganda*. 2021.
- 485 21. Hewlett, B.S. and R.P. Amola, *Cultural Contexts of Ebola in Northern Uganda*, in *Health*  
486 *Psychology*. 2016, Routledge. p. 369-377.

- 487 22. Chukwuneke, F., et al., *Culture and biomedical care in Africa: the influence of culture on*  
488 *biomedical care in a traditional African society, Nigeria, West Africa*. Nigerian Journal of Medicine, 2012.  
489 **21**(3): p. 331-333.
- 490 23. Mueller, K., *Turning to traditional healers to help stop the Ebola outbreak in Sierra Leone*.  
491 *Retrieved August 20, 2014*. 2014.
- 492 24. Marshall, K., *Responding to the Ebola Epidemic in West Africa: What Role Does Religion Play?*  
493 2016.
- 494 25. Bah, S.M. and A.S. Aljoudi, *Taking a religious perspective to contain Ebola*. The Lancet, 2014.  
495 **384**(9947): p. 951.
- 496 26. Sun, J., et al., *Ebola virus outbreak returns to the Democratic Republic of Congo: an urgent rising*  
497 *concern*. Annals of medicine and surgery, 2022. **79**: p. 103958.
- 498 27. Hewlett, B.S. and R.P. Amola, *Cultural contexts of Ebola in northern Uganda*. Emerging infectious  
499 diseases, 2003. **9**(10): p. 1242.
- 500 28. Okware, S.I., et al., *Managing Ebola from rural to urban slum settings: experiences from Uganda*.  
501 African health sciences, 2015. **15**(1): p. 312-321.
- 502 29. Prevention., C.f.D.C.a., *The CDC field epidemiology manual, CDC Excel Tool for thematic analysis,*  
503 *ver.10.18.22.2018*.
- 504 30. Kaawa-Mafigiri, D., F. Kato, and M. Schmidt-Sane, *TACKLING DEADLY DISEASES IN AFRICA: KEY*  
505 *CONSIDERATIONS FOR EPIDEMIC RESPONSE AND PREPAREDNESS IN UGANDA*.  
506
